# Supplementary material
Source: Springer Nature journal article supplement (https://www.springermedizin.de/resource/supplementary/12936_2013_2966_MOESM4_ESM.pdf/9544678)

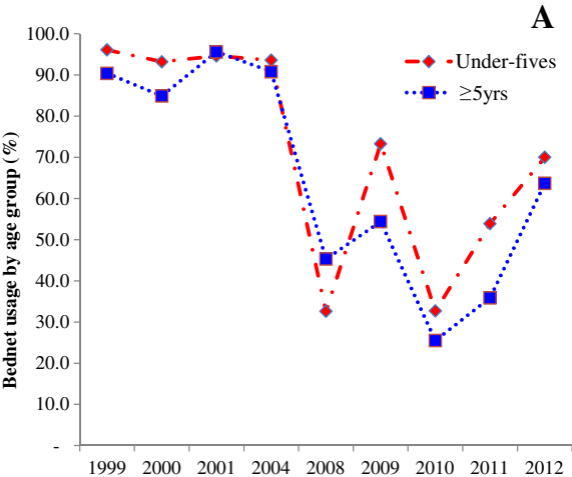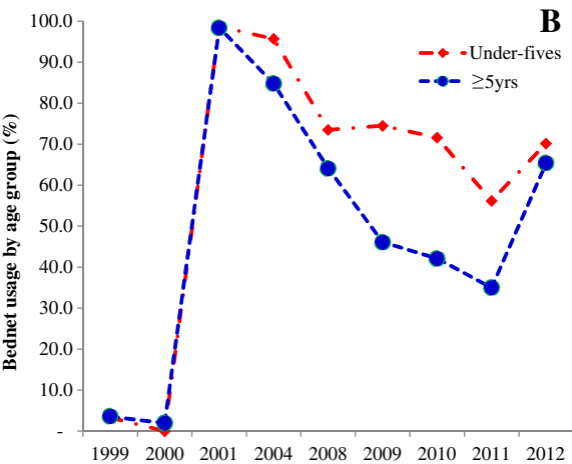

A = Magoda and B = Mpapayu village

$\geq 5$  years = individuals aged between 5 and 19 years

Supplement: MOESM4 [file 9544678]
